1 Factors mediating synergism between vancomycin and chlorhexidine in VanA-type  
2 vancomycin-resistant *Enterococcus faecium*

3  
4 Pooja Bhardwaj<sup>a</sup>, Moutusee Z. Islam<sup>a</sup>, and Kelli L. Palmer<sup>a\*</sup>  
5

6 <sup>a</sup>Department of Biological Sciences, University of Texas at Dallas, Richardson, Texas 75080  
7  
8  
9  
10  
11  
12

13 Running title: Vancomycin and chlorhexidine synergism in VRE  
14  
15

16 \*Contact information for corresponding author:  
17

18 Kelli Palmer: [kelli.palmer@utdallas.edu](mailto:kelli.palmer@utdallas.edu)  
19  
20  
21  
22  
23  
24  
25  
26

27 **Abstract**

28

29 Enterococci are Gram-positive gastrointestinal tract colonizers of humans and animals.  
30 Vancomycin-resistant enterococci (VRE) are important nosocomial pathogens and can cause  
31 life-threatening infections. To control hospital-associated infections, skin antisepsis and bathing  
32 utilizing chlorhexidine is recommended for VRE patients in acute care hospitals. Previously, we  
33 reported that exposure to inhibitory chlorhexidine levels induced the expression of vancomycin  
34 resistance genes in VanA-type *Enterococcus faecium*. However, vancomycin susceptibility  
35 actually increased for VanA-type *E. faecium* in the presence of chlorhexidine. Hence, a  
36 synergistic effect of the two antimicrobials was observed. In this study, we tested various  
37 models to elucidate the mechanism(s) of synergism between chlorhexidine and vancomycin.  
38 We deleted each of the *pbp* genes from a model VanA-type VRE *E. faecium* strain. We found  
39 that deletion of *ddcP*, a membrane-bound carboxypeptidase, resulted in partial loss of  
40 synergism. Interestingly, addition of excess D-lactate, but not D-alanine, enhanced synergism.  
41 Furthermore, we isolated a synergy escaper mutant in *E. faecium* and utilized whole genome  
42 sequencing to determine that a mutation in a gene encoding an ATPase of phosphate-specific  
43 transporters (*pstB*) also resulted in loss of synergism. Our study is significant because  
44 understanding the mechanisms for chlorhexidine-induced vancomycin resensitization in VRE  
45 could lead to new combinatorial therapeutics to treat VRE infections.

46

47

48

49

50

51

52

## 53 Introduction

54

55 *Enterococcus faecium* and *E. faecalis* are Gram-positive commensal bacteria inhabiting the  
56 gastrointestinal tracts of humans and animals (1). A recently published evolutionary history of  
57 the enterococci elucidated how these bacteria became the leading causes of hospital-  
58 associated infections (2). The ability to survive in harsh environmental conditions including  
59 starvation and desiccation facilitated the emergence of hospital-adapted strains which are  
60 resistant to the action of antibiotics and disinfectants. Hospital-adapted enterococcal strains  
61 have limited treatment options and are typically characterized by high-level resistance to  
62 vancomycin, a glycopeptide antibiotic which inhibits the process of peptidoglycan synthesis (3,  
63 4). Vancomycin-resistant enterococci (VRE) synthesize peptidoglycan precursors for which  
64 vancomycin has low affinity (5-8). Vancomycin resistance in hospital-adapted enterococcal  
65 isolates occurs through the horizontal acquisition of resistance genes (9, 10). For VanA-type  
66 VRE, vancomycin resistance is conferred and controlled by the activities encoded by the  
67 *vanRS*, *vanHAX*, and *vanYZ* genes.

68

69 Patients in critical care units are frequently bathed or cleansed with chlorhexidine, a cationic cell  
70 membrane-targeting antimicrobial, to reduce the occurrence of hospital-associated infections  
71 (11-13). Chlorhexidine interacts with the negatively charged phospholipids and proteins on the  
72 cell membrane after primary adsorption by the cell (14, 15). Low chlorhexidine levels disrupt the  
73 membrane potential and integrity whereas high chlorhexidine levels can cause a complete  
74 precipitation of the cytoplasm (16-18). We performed transcriptomic analysis of a VanA-type  
75 vancomycin-resistant *E. faecium* exposed to inhibitory levels of chlorhexidine and found that  
76 chlorhexidine stress induced the expression of genes associated with vancomycin and  
77 daptomycin resistance (19, 20). However, vancomycin MIC decreased when chlorhexidine was  
78 present in broth microdilution assays (19). In this study, we identified molecular factors that alter

79 this phenotype, with the ultimate aim to exploit synergism between vancomycin and  
80 chlorhexidine.

81

82 Here, we investigated three models we previously proposed (19) to explain chlorhexidine-  
83 induced vancomycin sensitization despite transcriptional activation of VanA-type vancomycin  
84 resistance genes by chlorhexidine. Vancomycin resistance genes code for the synthesis of  
85 alternative peptidoglycan precursors that terminate in D-alanine-D-lactate (D-Ala-D-Lac), for  
86 which vancomycin has lower affinity compared to the normal D-alanine-D-alanine (D-Ala-D-Ala).  
87 Model 1 is that altered penicillin-binding protein (*pbp*) expression in the presence of  
88 chlorhexidine prevents D-Ala-D-Lac precursors from being cross-linked. Model 2 proposes that  
89 chlorhexidine alters substrate pools for peptidoglycan synthesis, resulting in vancomycin-  
90 sensitive termini that are neither D-Ala-D-Ala nor D-Ala-D-Lac. Model 3 is that post-translational  
91 regulation of VanX and/or VanY prevents depletion of D-Ala-D-Ala termini from peptidoglycan  
92 precursors in the presence of chlorhexidine. Overall, elucidating mechanisms for chlorhexidine-  
93 induced vancomycin susceptibility in VRE could lead to new therapeutics for the treatment of  
94 VRE infections.

95

## 96 **Materials and Methods**

97

98 **Bacterial strains and growth conditions.** Bacterial strains used in this study are shown in  
99 Table 1. *E. faecium* and *E. faecalis* were cultured at 37°C on brain heart infusion (BHI) agar or  
100 in broth without agitation unless otherwise stated. *Escherichia coli* was cultured at 37°C in  
101 lysogeny broth (LB) broth with shaking at 225 rpm or on LB with 1.5% agar unless otherwise  
102 stated. The chlorhexidine product used for all experiments was Hibiclens (4% wt/vol  
103 chlorhexidine gluconate with 4% isopropyl alcohol). We refer to Hibiclens as H-CHG in this  
104 study. Antibiotics were added at the following concentrations: vancomycin, 50 µg/ml for *E.*

105 *faecium*, and chloramphenicol, 15 µg/ml for *E. coli* and *E. faecium*.

106

107 **Routine molecular biology techniques.** *E. faecium* genomic DNA (gDNA) was isolated using  
108 a previously published protocol (21). Electroporation of *E. faecium* was performed as described  
109 previously (19). Plasmids were purified using the GeneJET Miniprep kit (Thermo Scientific).  
110 DNA fragments were purified using the Purelink PCR purification kit (Invitrogen). *Taq*  
111 polymerase (New England Biolabs; NEB) was used for routine PCR reactions. Phusion  
112 polymerase (Fisher) was used for cloning applications. Restriction endonucleases (NEB) and T4  
113 DNA ligase (NEB) reactions were performed per the manufacturer's instructions. Routine DNA  
114 sequencing was performed by the Massachusetts General Hospital DNA core facility (Boston,  
115 MA). All genetic constructs were validated by DNA sequencing. Primers used in this study are  
116 shown in Table S1.

117

118 **MIC determinations.** The minimum inhibitory concentration (MIC) was defined as the lowest  
119 drug concentration at which the OD<sub>600nm</sub> of the bacterial culture matched the OD<sub>600nm</sub> of the  
120 negative control (uninoculated BHI broth). For this study, we refer to synergy MIC as the  
121 vancomycin MIC of enterococci in BHI supplemented with H-CHG. The synergy MIC was  
122 determined by slightly modifying our previously published protocol (19). 5 µl of vancomycin  
123 stock solution (40 mg/ml in water) was added to 195 µl of BHI supplemented with H-CHG in the  
124 first well of a 96-well microtiter plate. Next, 100 µl was transferred to the next well containing  
125 100 µl of BHI supplemented with H-CHG to make two-fold serial dilutions of vancomycin drug.  
126 Overnight cultures of *E. faecium* or *E. faecalis* were diluted to OD<sub>600</sub> of 0.01 in fresh BHI, and 5  
127 µl of the diluted culture was used to inoculate the wells of the plate. The OD<sub>600</sub> of the cultures  
128 was measured after 24 h incubation at 37°C. For determining synergy MIC in the presence of D-  
129 lactate or D-alanine, D-lactate or D-alanine were solubilized to a final concentration of 0.2 M in  
130 BHI and the solutions were filter sterilized. Two-fold serial dilutions of vancomycin were made in

131 BHI supplemented with D-lactate/D-alanine and H-CHG as described above. Fold decrease was  
132 calculated by dividing the vancomycin MIC in the absence of H-CHG by the vancomycin MIC in  
133 the presence of the highest H-CHG concentration at which visible growth was observed. The  
134 experiment was performed at least three times.

135

136 **Deletion of genes in *E. faecium*.** Genes were deleted in-frame utilizing plasmid pHA101 as  
137 described previously (19). Briefly, ~1 kb regions upstream and downstream of the target gene  
138 were amplified and ligated to pHA101. The sequence of the deletion construct plasmid was  
139 verified by Sanger sequencing and introduced into *E. faecium* by electroporation. Temperature  
140 shifting at the non-permissible temperature of 42°C and counter-selection with *p*-  
141 chlorophenylalanine was followed according to a previously published protocol (22). Deletion  
142 mutants were confirmed by DNA sequencing of the region of interest.

143

144 After several unsuccessful attempts to generate unmarked deletions of *pbpA* and *pbp5* genes in  
145 *E. faecium* 1,231,410 (*E. faecium* 410), we introduced a tetracycline resistance marker (*tetL*)  
146 between the flanking upstream and downstream arms of the deletion constructs to select for  
147 deletion mutants. Briefly, *tetL* was amplified from pLT06-*tet* using primers *tetL* For and Rev. The  
148 deletion constructs were linearized via PCR using Phusion DNA polymerase (Fisher) and  
149 primers *pbpA/5-linear* For and Rev (Table S1). The linearized PCR products were  
150 dephosphorylated using Shrimp Alkaline phosphatase (New England Biolabs) per the  
151 manufacturer's instructions and then ligated with *tetL* to generate the deletion constructs PB408  
152 and PB409. The deletion construct was propagated in EC1000 and sequenced using Sanger  
153 sequencing prior to transformation into *E. faecium* 410.

154

155 **Complementation of *ddcP* deletion.** The *ddcP* gene was restored to the chromosome of the  
156 *E. faecium* 410 *ddcP* deletion mutant. The *ddcP* gene and ~1 kb regions up- and downstream

157 were amplified from *E. faecium* 410 wild-type gDNA, and the amplicon was digested and  
158 inserted into pHA101. The knock-in plasmid construct (pMI101) was transformed into the *ddcP*  
159 deletion mutant by electroporation. The temperature shifting and counter-selection protocol was  
160 followed as described previously (22). The chromosomal integration of the gene was confirmed  
161 by Sanger sequencing.

162

163 **Growth kinetics of *E. faecium* in the presence of H-CHG and vancomycin.** Overnight  
164 cultures of *E. faecium* were diluted to an OD<sub>600</sub> of 0.01 in fresh, pre-warmed BHI and incubated  
165 at 37°C with shaking at 100 rpm. The cultures were grown until OD<sub>600</sub> reached 0.5 to 0.6.  
166 Twenty-five milliliters of the culture were added to equal amounts of pre-warmed BHI containing  
167 vancomycin (50 µg/ml) and/or H-CHG (4.9 µg/ml), or only BHI (control). OD<sub>600</sub> values were  
168 monitored for 6 h, and an OD<sub>600</sub> reading was taken at the 24 h time point. The growth curves  
169 were repeated independently three times. For assessing synergy between vancomycin and  
170 glycine, the same experimental design was used, except that H-CHG was replaced with 0.2 M  
171 glycine.

172

173 **Isolation of *E. faecium* 1,231,410 synergy escaper mutant.** An *E. faecium* 410 wild-type  
174 culture treated with vancomycin and H-CHG was incubated for 24 h, when turbidity was  
175 observed. The recovered culture was used as an inoculum for a second growth curve  
176 experiment with vancomycin and H-CHG. OD<sub>600</sub> values were monitored for 6 h, and at the end  
177 of 6 h, the cultures were cryopreserved at -80°C. The stocked populations were struck on BHI  
178 agar, and the synergy MIC was determined for well-isolated colonies using the broth  
179 microdilution assay described above. Colonies with elevated synergy MIC as compared to the  
180 parental *E. faecium* 410 strain were passaged three times in BHI broth and the synergy MICs  
181 determined again. A strain with a stably elevated synergy MIC was isolated; this strain is  
182 referred to as SE101.

183

184 **Genome sequencing and analysis.** SE101 gDNA was isolated according to a previously  
185 published protocol (21) and sequenced with Illumina technology at Molecular Research LP  
186 (Shallowater, Texas). Paired end, 2x150 reads were obtained. For the analyses, sequence  
187 reads were assembled locally to the *E. faecium* 410 draft reference genome (GenBank  
188 accession number NZ\_ACBA00000000.1) using default parameters in CLC Genomics  
189 Workbench (Qiagen). Polymorphisms in the resequencing assemblies were detected using  
190 basic variant mapping using default settings with a minimum variant frequency of 50%. To  
191 detect transposon/IS element hopping, the assembly parameters were changed to global  
192 instead of local alignment, and regions with sequential polymorphisms were manually analyzed  
193 for potential transposon/IS element hopping. Sanger sequencing was utilized to confirm  
194 polymorphisms.

195

196 **Phosphate levels measurement.** A commercially available kit (Sigma MAK030) and previously  
197 published protocol (20, 23) was utilized to measure intracellular inorganic phosphate ( $P_i$ ) levels  
198 at five time points ( $OD_{600}$  from 0.4-0.5, 0.6-0.7, 0.7-0.8, 0.8-0.9, 1.0-1.5) from *E. faecium* 410  
199 and SE101 cultures. The phosphate levels were normalized by CFU and five independent trials  
200 were performed.

201

202 **Accession number.** Raw Illumina sequencing reads generated in this study are available in the  
203 Sequence Read Archive under the accession number SRP113791.

204

## 205 **Results and Discussion**

206

207 **Effect of sub-inhibitory H-CHG on vancomycin MIC in enterococci with different**  
208 **vancomycin resistance phenotypes.** In enterococci, vancomycin resistance can be of



209 different types depending on the ligase gene (4, 24-26); however, all types rely on modification  
210 of the terminal peptidoglycan precursor to confer resistance. The VanA and VanB phenotypes  
211 are the most prevalent in VRE clinical isolates in the U.S. and confer a D-Ala-D-Lac substitution,  
212 whereas VanC-type enterococci less frequently cause clinical infections and have a D-Ala-D-  
213 Serine substitution (27). We previously reported induction of vancomycin resistance genes upon  
214 exposure to H-CHG in VanA-type enterococci (19). Utilizing broth microdilution assays, we  
215 sought to determine the effect of varying levels of H-CHG on vancomycin MIC in enterococci  
216 with different vancomycin resistance phenotypes (Table 1). As shown in Table 2, H-CHG  
217 increased the susceptibility of the VanA-type *E. faecium* strains 1,231,410 (*E. faecium* 410) and  
218 1,231,502 and the *E. faecalis* HIP11704 to vancomycin, with 1024-, 16- and 42-fold decrease in  
219 vancomycin MIC observed, respectively. The results for *E. faecium* 410 are consistent with our  
220 previously reported results (19). Vancomycin MIC decreased 85-fold for the VanB-type *E.*  
221 *faecium* strain TUH4-64 and only 2-fold for the VanB-type *E. faecalis* V583 (Table 2). Only a 2-4  
222 fold change in vancomycin MIC was observed for VRE with the VanC phenotype and for  
223 vancomycin-susceptible enterococci. Furthermore, as we previously reported (19), in the  
224 absence of *vanR* response regulator, vancomycin MIC decreased by only 4-fold for a  $\Delta$ *vanR*  
225 derivative of the VanA-type *E. faecium* strain 410 (Table 2). Overall, we conclude that the  
226 effects of H-CHG/vancomycin co-treatment are strain-variable for reasons that are as yet  
227 unclear.

228  
229 **Addition of D-lactate enhances chlorhexidine-induced vancomycin sensitization.** It was  
230 previously observed that culture supplementation with 0.2 M of glycine or select D-amino acids  
231 (including D-methionine, D-serine, D-alanine, or D-phenylalanine) increased VRE susceptibility  
232 to vancomycin (28). Consistent with this, Aart et al recently reported that excess D-Ala substrate  
233 competes with D-Lac, thereby increasing the ratio of cell wall termini ending at D-Ala and the  
234 efficacy of vancomycin against *Streptomyces* and *E. faecium* (29). We reasoned that if H-CHG

235 stress resulted in an alteration of substrate pools and therefore vancomycin-sensitive termini  
236 that are neither D-Ala-D-Ala nor D-Ala-D-Lac (Model 2), an excess of D-lactate could compete  
237 with this alternative pathway, thereby increasing the number of D-Ala-D-Lac termini and  
238 resulting in loss of synergism between vancomycin and H-CHG.

239  
240 To test this, synergy assays were performed with the VanA-type VRE strain *E. faecium* 410 in  
241 the presence of 0.2 M D-lactate or D-alanine (Table 3). *E. faecium* 410 was selected because  
242 we observed the strongest synergism phenotype with this strain (Table 2). Addition of D-lactate  
243 to BHI broth lacking H-CHG resulted in a 4-fold increase in vancomycin MIC (Table 3),  
244 demonstrating that excess D-lactate does in fact result in reduced vancomycin susceptibility.  
245 However, and counter to our expectations, in the presence of both D-lactate and H-CHG, the H-  
246 CHG-induced vancomycin resensitization phenotype was enhanced (Table 3). This result  
247 indicates that the synergism phenotype is dependent upon D-Ala-D-Lac termini and is enhanced  
248 by increased abundance of D-Ala-D-Lac termini. As expected based on the results of Aart et al  
249 (29), vancomycin MIC decreased in the presence of D-alanine, and we observed only a 2-fold  
250 additional MIC decrease in the presence of both D-alanine and H-CHG (Table 3).

251  
252 **Deletion of *ddcP* results in partial loss of synergism against *E. faecium* 1,231,410.** The  
253 enterococcal cell wall is a multi-layered network and is characterized by the presence of  
254 peptidoglycan, teichoic acid, and polysaccharides (30, 31). The main component of the cell wall  
255 is peptidoglycan, which is a mesh-like structure (30) and consists of parallel glycan chains  
256 cross-linked by amino acids. The glycan chains consist of two alternating amino sugars, N-  
257 acetylglucosamine (GlcNAc) and N-acetylmuramic acid (MurNAc), connected by  $\beta$ -1,4 linkages  
258 (32-34). In *E. faecium*, each MurNAc sugar is linked to short stem pentapeptides (L-alanine<sup>1</sup>-D-  
259 isoglutamic acid<sup>2</sup>-L-lysine<sup>3</sup>-D-alanine<sup>4</sup>-D-alanine<sup>5</sup>), which alternate between L- and D-amino  
260 acids (33, 35). The MurNAc and GlcNAc glycan sugars are synthesized as a UDP (Uridine

261 diphosphate) derivative in a step-wise fashion in the cytosol (36). Next, MurNAc sugars  
262 containing short peptides are transferred to a lipid carrier Lipid I (C55-undecaprenol) (37, 38)  
263 and added to UDP-derivative GlcNAc to build a disaccharide, GlcNAc-MurNAc-pentapeptide-  
264 C55 pyrophosphate, also known as Lipid II (36, 37). Lipid II units are translocated from the  
265 cytosol to the outer side of the cell membrane (39) and polymerized through an ordered rate of  
266 two processes, transglycosylation (condensation of linear glycan chains) and transpeptidation  
267 (cross-linking between carboxyl group of one pentapeptide and amino acid of an adjacent  
268 pentapeptide). The disaccharide units are integrated into the growing peptidoglycan layers to  
269 form the cell wall (40, 41) and the lipid carrier is recycled back into the cytosol.

270

271 Two classes of penicillin-binding proteins (Pbps) mediate the transpeptidation process (42-44).  
272 Class A Pbps (encoded by *ponA*, *pbpF*, and *pbpZ*) are bifunctional, multimodular, high-  
273 molecular mass proteins, and catalyze both transpeptidation and transglycosylation reactions.  
274 Class B Pbps (encoded by *pbpB*, *pbpA*, and *pbp5*) are monofunctional, low-molecular mass  
275 proteins, and catalyze only transpeptidation reactions. Class A and B Pbps mediate 4,3 cross-  
276 links (D,D-transpeptidation) between cell wall precursors and these cross-links constitute the  
277 majority of the mature cell wall (41). However, 3,3 cross-links are also present in the  
278 enterococcal cell wall. The combined activities of DdcP or DdcY (D,D-carboxypeptidase) and  
279 the L,D transpeptidase Ldt<sub>fm</sub> can bypass conventional D,D-transpeptidation and mediate 3,3  
280 cross-linking (45-47). DdcP and/or DdcY generates tetrapeptides and reduces the availability of  
281 pentapeptide precursors by trimming the terminal D-Ala. Next, Ldt<sub>fm</sub> mediates cross-links  
282 between these cell wall termini.

283

284 To determine whether Pbps contribute to vancomycin-chlorhexidine synergism against VRE  
285 (Model 1), we deleted each of these genes in *E. faecium* 410 (Table 1). We utilized growth  
286 curves to assess phenotypes of the deletion mutants in the presence and absence of

287 vancomycin and H-CHG. For these experiments, vancomycin (50 µg/ml) and H-CHG (4.9 µg/ml)  
288 were added to exponentially growing *E. faecium* cultures; a no-drug control was also performed.  
289 As shown in Fig. 1A, the OD<sub>600</sub> of *E. faecium* 410 wild-type cultures decreased after addition of  
290 vancomycin and H-CHG, consistent with cell lysis. After 24 h, the cultures treated with  
291 vancomycin and H-CHG were visibly turbid, indicating that *E. faecium* can recover from the  
292 effects of the antimicrobials in this experimental condition.

293  
294 A  $\Delta ddcP$  mutant had a different phenotype from the wild-type strain in this assay (Fig. 1B). After  
295 treatment with vancomycin and H-CHG, the OD<sub>600</sub> values for the *ddcP* deletion mutant did not  
296 decrease; rather, a bacteriostatic effect was observed. We conclude that deletion of *ddcP*  
297 results in a partial loss of synergism between vancomycin and H-CHG. The difference in the  
298 OD<sub>600</sub> values was statistically significant between the wild-type and the  $\Delta ddcP$  mutant for all  
299 time points post-H-CHG and vancomycin addition ( $P$ -value < 0.05, one-tailed Student's  $t$  test).  
300 The  $\Delta ddcP$  mutant was complemented by restoration of the *ddcP* gene in *cis*. The growth  
301 phenotype of the complemented strain in the presence of vancomycin and H-CHG was similar  
302 to the wild-type (Fig. 1C). No statistically significant differences in growth were observed  
303 between the wild-type and the *ddcP* complemented strain in the presence of vancomycin and H-  
304 CHG.

305  
306 The growth phenotypes of the  $\Delta pbpF$ ,  $\Delta ponA$ ,  $\Delta pbpZ$ ,  $\Delta pbpA$ ,  $\Delta pbp5$ ,  $\Delta ddcY$ ,  $\Delta Idt_{im}$ , and  $\Delta vanY$   
307 deletion mutants were comparable to the parental strain (Fig. S1A-L) with one exception. In the  
308 absence of the *pbpB* transpeptidase (Fig. S1H), the cultures did not recover from the effect of  
309 vancomycin and H-CHG after up to 48 h of incubation.

310  
311 **A  $\Delta ddcP$  mutant is resistant to vancomycin-glycine synergy.** Synergism between glycine  
312 and vancomycin was previously reported for VRE (28). To determine if the *E. faecium*  $\Delta ddcP$

313 mutant is resistant to the synergistic combination of glycine and vancomycin, we carried out  
314 growth curves in the presence of vancomycin (50 µg/ml) and 0.2 M glycine. A lytic effect was  
315 observed for the wild-type strain cultured with vancomycin and glycine, with the most  
316 pronounced effect observed at the 24 h time point (Fig. 2A). However, this lytic effect was not  
317 observed for the  $\Delta ddcP$  mutant ( $P$ -value < 0.05, assessed by one-tailed Student's  $t$ -test) (Fig.  
318 2B).

319  
320 **VanY<sub>A</sub> does not contribute to the synergy phenotype.** Previously, Kristich et al investigated  
321 the genetic basis of synergism between vancomycin and cephalosporins (a class of β-lactam  
322 antibiotics) in the VanB-type VRE strain *E. faecalis* V583 (48). The synergism was mediated by  
323 VanY<sub>B</sub>, a carboxypeptidase that reduces the availability of precursors ending at D-Ala-D-Ala by  
324 trimming the terminal D-Ala, thereby eliminating the target of vancomycin. In the absence of  
325 *vanY<sub>B</sub>*, cross-linking of cell wall precursors was mediated by low-affinity Pbps and synergism  
326 between vancomycin and cephalosporins was lost (48). To determine whether *vanY<sub>A</sub>*  
327 contributed to vancomycin-chlorhexidine synergism against VRE, which is a component of our  
328 Model 3, we deleted *vanY<sub>A</sub>* in *E. faecium* 410. We observed no effect on the synergy phenotype  
329 (Fig. S1C). Moreover, deletion of *ddcP* in a  $\Delta vanY$  background did not further enhance the  
330 phenotype of a  $\Delta ddcP$  mutant (Fig. S2E).

331  
332 ***E. faecium* 1,231,410 can escape from vancomycin-chlorhexidine synergy.** We observed  
333 the growth kinetics of *E. faecium* 410 cultures exposed to no, either, or both 50 µg/ml  
334 vancomycin and 4.9 µg/ml H-CHG over a two-day growth curve experiment. As shown in Fig.  
335 3A, cultures exposed to vancomycin were growth-inhibited for the first 2.5 h after exposure, and  
336 after 2.5 h, OD<sub>600</sub> began to increase, consistent with the induction of vancomycin resistance  
337 genes and synthesis of modified cell walls, as previously observed (49, 50). The cultures  
338 exposed to H-CHG were also temporarily growth-inhibited. Consistent with the experiments

339 shown in Fig. 1A, the OD<sub>600</sub> of cultures exposed to both vancomycin and H-CHG declined,  
340 consistent with cell lysis, and after 24 h, the cultures recovered.

341  
342 The next day, the recovered culture (from the vancomycin + H-CHG growth curve) was used as  
343 an inoculum to repeat the growth curve experiment (Fig. 3B). Interestingly, the growth inhibition  
344 phenotypes observed for the first growth curve experiment were not observed in this second  
345 passage. Most strikingly, cell lysis was no longer observed for the vancomycin- and  
346 chlorhexidine-treated culture. This is an important observation since it indicates that synergy  
347 mutant(s) that do not lyse in the presence of vancomycin and H-CHG can readily emerge.

348  
349 **Synergy escape mutants have a mutation in *pstB*.** We colony-purified a synergy escaper  
350 mutant (SE101) from the second growth curve cycle, as described in the materials and  
351 methods. The growth kinetics of SE101 in the presence of vancomycin and H-CHG confirmed  
352 that the synergism phenotype is altered in this strain (Fig. 4A and B). SE101 was initially  
353 growth-inhibited in the presence of vancomycin and H-CHG, but after 3 h, OD<sub>600</sub> values began  
354 to increase, unlike what is observed for the wild-type. Significant differences in OD<sub>600</sub> values  
355 were observed for SE101 compared to the wild-type for time points 3 h after addition of  
356 vancomycin and H-CHG ( $P$ -value < 0.05 using one-tailed Student's  $t$  test).

357  
358 Utilizing whole genome sequencing, we identified a mutation conferring a S199L substitution in  
359 PstB (EFTG\_01173) in SE101. As a result of this substitution, the protein is predicted to fold into  
360 a beta-strand instead of a coil (51). The *pst* (phosphate-specific transport) operon has been well  
361 characterized in *E. coli* and consists of *pstSCAB* and *phoU* (a regulator). In phosphate-  
362 starvation conditions, inorganic phosphate (Pi) binds PstS and is released into the cytoplasm by  
363 the inner membrane channel formed by PstA-PstC. PstB energizes this channel by hydrolyzing  
364 ATP (52). We quantified the levels of intracellular inorganic phosphate (Pi) in the wild-type strain

365 and in SE101. However, the levels were not significantly different for any time point assayed  
366 (Fig. S2).

367  
368 To determine if the *pstB* mutation resulted in a gain or loss of function, we deleted the complete  
369 *pst* transport system (EFTG\_01170-74) in SE101 and in the *E. faecium* 410 wild-type. The  
370 growth observed in the presence of vancomycin and H-CHG for the SE101 $\Delta$ *pst* deletion mutant  
371 was significantly different as compared to SE101 (Fig. 4B and D; *P*-value < 0.05 using one-  
372 tailed Student's *t* test). Specifically, unlike SE101, the OD<sub>600</sub> values did not increase for the  
373 SE101 $\Delta$ *pst* deletion mutant after 3 h in the presence of vancomycin and H-CHG. We conclude  
374 that the *pstB* mutation in SE101 resulted in a gain of function; however, the exact mechanism(s)  
375 for this is unclear.

376  
377 **Conclusions and perspective.** Combinatorial therapeutics that exploit specific vulnerabilities of  
378 VRE are possible novel therapies against VRE. We previously reported that VRE exhibit  
379 increased susceptibility to vancomycin in the presence of chlorhexidine (19). The goal of the  
380 current study was to identify molecular contributors to this phenotype. The long-term goal is to  
381 use this information to identify less toxic compounds that could be compounded with  
382 vancomycin to exploit this vulnerability. That said, products incorporating chlorhexidine with  
383 antibiotics have been previously reported. Synergism between vancomycin and chlorhexidine  
384 was previously reported in methicillin-resistant *Staphylococcus aureus*, where chitosan-based  
385 sponges were utilized for localized delivery of these two synergistic compounds that inhibited *S.*  
386 *aureus* growth for 21 days (53). Another study exploited synergism between chlorhexidine and  
387  $\beta$ -lactam antibiotics and synthesized hybrid organic salts (GUMBOS), which were effective  
388 against clinical isolates of Gram-positive and Gram-negative bacteria (54).

389  
390 In our previous report, we proposed three models that are not mutually exclusive that could

391 explain this phenotype. The models are reiterated here. Model 1 is that altered Pbp levels in the  
392 presence of chlorhexidine prevent D-Ala-D-Lac precursors from being cross-linked. Model 2  
393 proposes that the chlorhexidine stress response alters substrate pools for peptidoglycan  
394 synthesis, resulting in vancomycin-sensitive termini that are neither D-Ala-D-Ala nor D-Ala-D-  
395 Lac. Finally, model 3 is that post-translational regulation of VanX and/or VanY prevents  
396 depletion of D-Ala-D-Ala termini from peptidoglycan precursors in the presence of chlorhexidine,  
397 thereby causing cells to be sensitive to vancomycin. In terms of Model 2, the results of the D-  
398 lactate amendment study (Table 3) indicate that D-Ala-D-Lac termini (and therefore, induction of  
399 the vancomycin resistance genes) are required for the synergy phenotype. Model 3 is not  
400 supported by our observation that *vanY<sub>A</sub>* deletion has no impact on the synergy phenotype (Fig.  
401 S1). Note that *vanX<sub>A</sub>* was not investigated in this study.

402  
403 Growth analyses of the *E. faecium* *pbp* deletion mutants provide support for Model 1. To our  
404 knowledge, this is the first study to report successful deletion of all *pbp* genes in *E. faecium*.  
405 Upon *ddcP* deletion, which is predicted to result in increased availability of pentapeptide  
406 precursors for cross-linking, *E. faecium* 410 was less susceptible to the synergistic action of  
407 vancomycin and chlorhexidine. Our previously published transcriptomic study identified up to 5-  
408 fold induction of *ddcP* in *E. faecium* 410 cultures treated with the MIC of H-CHG for 15 minutes,  
409 as compared to untreated cultures (19). Overall, our data suggest that the combined activities of  
410 DdcP and the vancomycin resistance proteins are incompatible and result in cell lysis,  
411 presumably by autolysin activity, when both H-CHG and vancomycin are present. Interestingly,  
412 the *ddcP* deletion mutant displays similar growth kinetics in presence of vancomycin plus H-  
413 CHG (Figure 1B) and vancomycin plus 0.2 M D-glycine (Figure 2B). This suggests that  
414 substrate availability may also play some role in the synergy phenotype observed, but this is  
415 speculative. It is possible that in the presence of H-CHG, DdcP actively trims the terminal D-Ala  
416 from peptidoglycan precursors and generates tetrapeptides. At the same time, in the presence



417 of vancomycin, the combined activities of the vancomycin resistance genes result in  
418 pentapeptides terminating in D-Lac. The relative availability of penta- and tetrapeptides with  
419 chemically different termini likely impacts the overall efficiency of cross-linking and the strength  
420 of the cell wall. Since all Pbps do not have the same affinity for tetra- versus pentapeptides,  
421 unacceptable precursors for transpeptidation are synthesized in the presence of both  
422 vancomycin and chlorhexidine, and the cells lyse. However, complicating this explanation, we  
423 did not observe any difference in growth phenotype between the L,D transpeptidase (*ldt<sub>fm</sub>*)  
424 deletion mutant and the wild-type in the presence of vancomycin and H-CHG (Fig. S1F and G).  
425 As reported previously, activity of *Ldt<sub>fm</sub>* is dependent on availability of tetrapeptides (45, 46). If  
426 (and how) *Ldt<sub>fm</sub>* activity changes in the presence of vancomycin and H-CHG remains to be  
427 elucidated. A critical set of experiments will be to analyze peptidoglycan precursor pools and  
428 mature peptidoglycan structures in *E. faecium* cultures exposed to vancomycin and  
429 chlorhexidine. This analysis would allow us to analyze the relative balance of tetra- versus  
430 pentapeptide termini, as well as their chemical compositions.

431  
432 We also found that synergy escaper mutants (i.e., cells that failed to lyse) arose after 24 h of  
433 exposure to both vancomycin and chlorhexidine. A non-synonymous mutation in *pstB* conferred  
434 a survival advantage in the presence of the two antimicrobials. Deletion of the *pst* system and  
435 antimicrobial susceptibility has been previously linked. An *E. coli* *pst* deletion mutant has  
436 increased sensitivity to vancomycin and cationic antimicrobial peptides due to modification of  
437 lipid A (55). A non-synonymous mutation in *phoU*, a negative regulator of the *pst* operon, was  
438 present in a chlorhexidine-adapted *E. faecium* 410 derivative with reduced chlorhexidine and  
439 daptomycin susceptibilities and decreased intracellular Pi levels (20). However, the exact  
440 mechanism(s) of how the Pst system impacts antimicrobial susceptibility is unknown.

441  
442 Our results indicate that the mechanism of synergy between vancomycin and chlorhexidine is

443 multi-factorial. Interestingly, *in vitro*, *E. faecium* rapidly adapted and loss of synergism arose  
444 after just 24 h of exposure to vancomycin and chlorhexidine. Overall, our study highlights the  
445 complexity of the enterococcal cell wall stress response in response to combination  
446 antimicrobial therapy and identifies a novel contributor (*pstB*) to this response.

447

## 448 **Acknowledgements**

449

450 This work was supported by start-up funds from the University of Texas at Dallas to K.L.P. We  
451 are grateful to Dr. Breck Duerkop for providing the plasmid pLT06-*tet*.

452

453

454

455

456

457

458 **Table 1. Bacterial strains and plasmids used in the study.**

| <b>Strain or plasmid</b>                 | <b>Description</b>                                                                                                                                              | <b>Reference</b> |
|------------------------------------------|-----------------------------------------------------------------------------------------------------------------------------------------------------------------|------------------|
| <b>Bacterial strains</b>                 |                                                                                                                                                                 |                  |
| <i>E. faecium</i> 1,231,410              | Clade A clinical isolate from skin and soft tissue infection; VanA-type VRE                                                                                     | (56)             |
| <i>E. faecium</i> 1,141,733              | Clade B clinical isolate from blood; Van-susceptible                                                                                                            | (56)             |
| <i>E. faecium</i> TUH4-64                | Human clinical isolate; VanB-type VRE                                                                                                                           | (57)             |
| <i>E. faecium</i> 1,231,502              | Clade A clinical isolate from blood; VanA-type VRE                                                                                                              | (56)             |
| <i>E. faecalis</i> HIP11704              | VanA-type clinical isolate from wound                                                                                                                           | (58)             |
| <i>E. faecalis</i> V583                  | Clinical isolate from blood; VanB-type VRE                                                                                                                      | (59)             |
| <i>E. gallinarum</i> EG2                 | VanC-type clinical isolate from blood                                                                                                                           | (56)             |
| <i>E. casseliflavus</i> EC10             | VanC-type clinical isolate from blood                                                                                                                           | (56)             |
| <b>PBPs deletions/insertions mutants</b> |                                                                                                                                                                 |                  |
| PB411                                    | <i>E. faecium</i> 1,231,410 $\Delta pbpF$ (EFTG_02258)                                                                                                          | This study       |
| PB412                                    | <i>E. faecium</i> 1,231,410 $\Delta ddcP$ (EFTG_01253)                                                                                                          | This study       |
| PB413                                    | <i>E. faecium</i> 1,231,410 $\Delta vanY$ (EFTG_02039)                                                                                                          | This study       |
| PB414                                    | <i>E. faecium</i> 1,231,410 $\Delta Idtfm$ (EFTG_02461)                                                                                                         | This study       |
| PB415                                    | <i>E. faecium</i> 1,231,410 $\Delta pbpB$ (EFTG_00959)                                                                                                          | This study       |
| PB416                                    | <i>E. faecium</i> 1,231,410 $\Delta ponA$ (EFTG_00370)                                                                                                          | This study       |
| PB417                                    | <i>E. faecium</i> 1,231,410 $\Delta pbpZ$ (EFTG_01189)                                                                                                          | This study       |
| PB418                                    | <i>E. faecium</i> 1,231,410 $\Delta ddcP \Delta vanY$                                                                                                           | This study       |
| PB419                                    | <i>E. faecium</i> 1,231,410 $\Delta pbpA$ (EFTG_02132); marked deletion with <i>tetL</i>                                                                        | This study       |
| PB420                                    | <i>E. faecium</i> 1,231,410 $\Delta pbp5$ (EFTG_00244); marked deletion with <i>tetL</i>                                                                        | This study       |
| MI111                                    | <i>E. faecium</i> PB412 with reconstituted <i>ddcP</i>                                                                                                          | This study       |
| MI112                                    | <i>E. faecium</i> 1,231,410 $\Delta ddcP \Delta Idtfm$                                                                                                          | This study       |
| MI113                                    | <i>E. faecium</i> 1,231,410 $\Delta ddcY$ (EFTG_00498)                                                                                                          | This study       |
| <b>Synergy escaper mutants</b>           |                                                                                                                                                                 |                  |
| SE101                                    | Synergy escaper mutant; has Ser199Leu substitution in EFTG_01173                                                                                                | This study       |
| PB430                                    | <i>E. faecium</i> 410 $\Delta pst$ transporter (EFTG_01170-74)                                                                                                  | This study       |
| PB431                                    | SE101 $\Delta pst$ transporter (EFTG_01170-74)                                                                                                                  | This study       |
| <b>Plasmids</b>                          |                                                                                                                                                                 |                  |
| pHA101                                   | Markerless, counterselectable exchange plasmid; confers chloramphenicol resistance (Cam <sup>R</sup> )                                                          | (19)             |
| pPB401                                   | pHA101 containing a 2.028-kb EcoRI/EcoRI-digested fragment flanking upstream and downstream of <i>E. faecium</i> 410 <i>pbpF</i> (EFTG_02258), Cam <sup>R</sup> | This study       |
| pPB402                                   | pHA101 containing a 2.019-kb EcoRI/EcoRI-digested fragment flanking upstream and downstream of                                                                  | This study       |

|        |                                                                                                                                                                                                                                                                                                   |            |
|--------|---------------------------------------------------------------------------------------------------------------------------------------------------------------------------------------------------------------------------------------------------------------------------------------------------|------------|
| pPB403 | fragment flanking upstream and downstream of <i>E. faecium</i> 410 <i>ddcP</i> (EFTG_01253), Cam <sup>R</sup><br>pHA101 containing a 2.010-kb EcoRI/EcoRI-digested fragment flanking upstream and downstream of                                                                                   | This study |
| pPB404 | <i>E. faecium</i> 410 <i>vanY</i> (EFTG_02039), Cam <sup>R</sup><br>pHA101 containing a 2.010-kb EcoRI/EcoRI-digested fragment flanking upstream and downstream of                                                                                                                                | This study |
| pPB405 | <i>E. faecium</i> 410 <i>ldtfm</i> (EFTG_02461), Cam <sup>R</sup><br>pHA101 containing a 2.028-kb EcoRI/EcoRI-digested fragment flanking upstream and downstream of                                                                                                                               | This study |
| pPB406 | <i>E. faecium</i> 410 <i>pbpB</i> (EFTG_00959), Cam <sup>R</sup><br>pHA101 containing a 2.028-kb EcoRI/EcoRI-digested fragment flanking upstream and downstream of                                                                                                                                | This study |
| pPB407 | <i>E. faecium</i> 410 <i>ponA</i> (EFTG_00370), Cam <sup>R</sup><br>pHA101 containing a 2.028-kb EcoRI/EcoRI-digested fragment flanking upstream and downstream of                                                                                                                                | This study |
| pPB408 | <i>E. faecium</i> 410 <i>pbpZ</i> (EFTG_01189), Cam <sup>R</sup><br>pHA101 containing a 4.317-kb fragment containing flanking upstream, tetracycline resistance gene ( <i>tetL</i> ), downstream arms of <i>E. faecium</i> 410 <i>pbpA</i> EFTG_02132, confers tetracycline antibiotic resistance | This study |
| pPB409 | pHA101 containing a 3.555-kb fragment containing flanking upstream, tetracycline resistance gene ( <i>tetL</i> ), downstream arms of <i>E. faecium</i> 410 <i>pbp5</i> EFTG_00244, confers tetracycline antibiotic resistance                                                                     | This study |
| pPB410 | pHA101 containing a 2.028-kb BamH1/BamHI-digested fragment flanking upstream and downstream of                                                                                                                                                                                                    | This study |
| pMI101 | <i>E. faecium</i> 410 <i>ddcY</i> (EFTG_00498), Cam <sup>R</sup><br>pHA101 containing a 3.303-kb EcoRI/EcoRI-digested fragment flanking upstream and downstream arms with                                                                                                                         | This study |
| pPB411 | <i>ddcP</i> gene (EFTG_01253), Cam <sup>R</sup><br>pHA101 containing a 2.028-kb EcoRI/EcoRI-digested fragment flanking upstream and downstream of                                                                                                                                                 | This study |
|        | <i>E. faecium</i> 410 <i>pst</i> transporters (EFTG_01170-74), Cam <sup>R</sup>                                                                                                                                                                                                                   |            |

459  
460  
461

**Table 2. Median vancomycin MIC in the presence of H-CHG.**

| Strain                      | (Vancomycin MIC $\mu\text{g/ml}$ ) <sup>a</sup> |                                  |                                  |                                  | Van-type         | (Fold decrease) <sup>b</sup> |
|-----------------------------|-------------------------------------------------|----------------------------------|----------------------------------|----------------------------------|------------------|------------------------------|
|                             | BHI                                             | BHI + 1.2 $\mu\text{g/ml}$ H-CHG | BHI + 2.4 $\mu\text{g/ml}$ H-CHG | BHI + 4.9 $\mu\text{g/ml}$ H-CHG |                  |                              |
| <i>E. faecium</i> 1,231,410 | 250                                             | 62.5                             | 0.2                              | No growth                        | VanA             | 1024                         |
| <i>E. faecium</i> 1,231,502 | 625                                             | 39.1                             | No growth                        | No growth                        | VanA             | 16                           |
| <i>E. faecium</i> TUH4-64   | 78.2                                            | 24.4                             | 0.9                              | No growth                        | VanB             | 85                           |
| <i>E. faecalis</i> HIP11704 | 625                                             | 312.5                            | 156.5                            | 14.67                            | VanA             | 42                           |
| <i>E. faecalis</i> V583     | 39.1                                            | 39.1                             | 39.1                             | 19.56                            | VanB             | 2                            |
| <i>E. gallinarum</i> EG2    | 9.8                                             | 4.9                              | No growth                        | No growth                        | VanC             | 2                            |
| <i>E. casseliflavus</i>     | 2.5                                             | 2.4                              | 0.6                              | No growth                        | VanC             | 4                            |
| EC10                        |                                                 |                                  |                                  |                                  |                  |                              |
| <i>E. faecium</i> 1,141,733 | 1.2                                             | 0.6                              | No growth                        | No growth                        | Van <sup>S</sup> | 2                            |
| <i>E. faecium</i> 1,231,410 | 1.2                                             | 0.9                              | 0.3                              | No growth                        | Van <sup>S</sup> | 4                            |
| $\Delta\text{vanR}$         |                                                 |                                  |                                  |                                  |                  |                              |

462  
463 <sup>a</sup>Vancomycin MICs ( $\mu\text{g/ml}$ ) at 24 h post-inoculation from at least three independent  
464 experiments.

465 <sup>b</sup>Fold decrease was calculated by dividing the vancomycin MIC in the absence of H-CHG by the  
466 vancomycin MIC in the presence of highest concentration of H-CHG where growth was  
467 observed. Van<sup>S</sup>, Vancomycin susceptible.

468  
469  
470  
471  
472  
473  
474  
475  
476  
477  
478  
479  
480  
481  
482  
483  
484  
485  
486  
487  
488  
489  
490  
491  
492  
493  
494  
495

496  
497

**Table 3. Median vancomycin MICs in *E. faecium* 1,231,410.**

498

| H-CHG ( $\mu\text{g/ml}$ ) <sup>b</sup> | Vancomycin MIC ( $\mu\text{g/ml}$ ) <sup>a</sup> |                      |                      |
|-----------------------------------------|--------------------------------------------------|----------------------|----------------------|
|                                         | BHI                                              | BHI + 0.2M D-Lactate | BHI + 0.2M D-Alanine |
| 0                                       | 250                                              | 1000                 | 7.8                  |
| 1.2                                     | 62.5                                             | 1.0                  | 3.9                  |
| 2.4                                     | 0.2                                              | No growth            | No growth            |
| 4.9                                     | No growth                                        | No growth            | No growth            |

516

517 <sup>a</sup>Vancomycin MICs ( $\mu\text{g/ml}$ ) at 24 h post-inoculation from at least three independent  
518 experiments.

519 <sup>b</sup>4.9  $\mu\text{g/ml}$  H-CHG is the MIC for *E. faecium* 1,231,410; 1.2  $\mu\text{g/ml}$  H-CHG and 2.4  $\mu\text{g/ml}$  H-CHG  
520 are 1/4X MIC and 1/2X MIC, respectively.

521  
522  
523  
524  
525  
526  
527  
528  
529  
530  
531  
532  
533  
534  
535  
536  
537  
538  
539  
540  
541  
542  
543

544  
545  
546  
547  
548  
549  
550  
551  
552  
553  
554  
555  
556  
557  
558  
559  
560  
561  
562  
563  
564  
565  
566  
567  
568  
569  
570  
571

## References

1. **Agudelo Higueta NI, Huycke MM.** 2014. Enterococcal Disease, Epidemiology, and Implications for Treatment. *In* Gilmore MS, Clewell DB, Ike Y, Shankar N (ed), Enterococci: From Commensals to Leading Causes of Drug Resistant Infection, Boston.
2. **Lebreton F, Manson AL, Saavedra JT, Straub TJ, Earl AM, Gilmore MS.** 2017. Tracing the Enterococci from Paleozoic Origins to the Hospital. *Cell* **169**:849-861 e813.
3. **Reynolds PE.** 1989. Structure, biochemistry and mechanism of action of glycopeptide antibiotics. *European journal of clinical microbiology & infectious diseases: official publication of the European Society of Clinical Microbiology* **8**:943-950.
4. **Courvalin P.** 2006. Vancomycin resistance in gram-positive cocci. *Clinical infectious diseases: an official publication of the Infectious Diseases Society of America* **42** Suppl 1:S25-34.
5. **Handwerger S, Pucci MJ, Volk KJ, Liu J, Lee MS.** 1992. The cytoplasmic peptidoglycan precursor of vancomycin-resistant *Enterococcus faecalis* terminates in lactate. *Journal of bacteriology* **174**:5982-5984.
6. **Allen NE, Hobbs JN, Jr., Richardson JM, Riggin RM.** 1992. Biosynthesis of modified peptidoglycan precursors by vancomycin-resistant *Enterococcus faecium*. *FEMS microbiology letters* **77**:109-115.
7. **Messer J, Reynolds PE.** 1992. Modified peptidoglycan precursors produced by glycopeptide-resistant enterococci. *FEMS microbiology letters* **73**:195-200.
8. **Liu J, Volk KJ, Lee MS, Pucci M, Handwerger S.** 1994. Binding studies of vancomycin to the cytoplasmic peptidoglycan precursors by affinity capillary electrophoresis. *Analytical chemistry* **66**:2412-2416.
9. **Leclercq R, Derlot E, Duval J, Courvalin P.** 1988. Plasmid-mediated resistance to vancomycin and teicoplanin in *Enterococcus faecium*. *The New England journal of*

- 572 medicine **319**:157-161.
- 573 10. **Woodford N.** 1998. Glycopeptide-resistant enterococci: a decade of experience. Journal  
574 of medical microbiology **47**:849-862.
- 575 11. **Munoz-Price LS, Hota B, Stemer A, Weinstein RA.** 2009. Prevention of bloodstream  
576 infections by use of daily chlorhexidine baths for patients at a long-term acute care  
577 hospital. Infection control and hospital epidemiology **30**:1031-1035.
- 578 12. **Muto CA, Jernigan JA, Ostrowsky BE, Richet HM, Jarvis WR, Boyce JM, Farr BM,  
579 Shea.** 2003. SHEA guideline for preventing nosocomial transmission of multidrug-  
580 resistant strains of *Staphylococcus aureus* and *Enterococcus*. Infection control and  
581 hospital epidemiology **24**:362-386.
- 582 13. **LeDell K, Muto CA, Jarvis WR, Farr BM.** 2003. SHEA guideline for preventing  
583 nosocomial transmission of multidrug-resistant strains of *Staphylococcus aureus* and  
584 *Enterococcus*. Infection control and hospital epidemiology **24**:639-641.
- 585 14. **Komljenovic I, Marquardt D, Harroun TA, Sternin E.** 2010. Location of chlorhexidine  
586 in DMPC model membranes: a neutron diffraction study. Chemistry and physics of lipids  
587 **163**:480-487.
- 588 15. **Koontongkaew S, Jitpukdeebodindra S.** 1995. Interaction of chlorhexidine with  
589 cytoplasmic membranes of *Streptococcus mutans* GS-5. Caries research **29**:413-417.
- 590 16. **Hugo WB, Longworth AR.** 1964. Some Aspects of the Mode of Action of Chlorhexidine.  
591 The Journal of pharmacy and pharmacology **16**:655-662.
- 592 17. **Hugo WB, Longworth AR.** 1965. Cytological Aspects of the Mode of Action of  
593 Chlorhexidine Diacetate. The Journal of pharmacy and pharmacology **17**:28-32.
- 594 18. **Hugo WB, Longworth AR.** 1966. The effect of chlorhexidine on the electrophoretic  
595 mobility, cytoplasmic constituents, dehydrogenase activity and cell walls of *Escherichia*  
596 *coli* and *Staphylococcus aureus*. The Journal of pharmacy and pharmacology **18**:569-  
597 578.



- 598 19. **Bhardwaj P, Ziegler E, Palmer KL.** 2016. Chlorhexidine Induces VanA-Type  
599 Vancomycin Resistance Genes in Enterococci. *Antimicrobial agents and chemotherapy*  
600 **60**:2209-2221.
- 601 20. **Bhardwaj P, Hans A, Ruikar K, Guan Z, Palmer KL.** 2018. Reduced Chlorhexidine  
602 and Daptomycin Susceptibility in Vancomycin-Resistant *Enterococcus faecium* after  
603 Serial Chlorhexidine Exposure. *Antimicrobial agents and chemotherapy* **62**: e01235-17.
- 604 21. **Adams HM, Li X, Mascio C, Chesnel L, Palmer KL.** 2015. Mutations associated with  
605 reduced surotomycin susceptibility in *Clostridium difficile* and *Enterococcus* species.  
606 *Antimicrobial agents and chemotherapy* **59**:4139-4147.
- 607 22. **Thurlow LR, Thomas VC, Hancock LE.** 2009. Capsular polysaccharide production in  
608 *Enterococcus faecalis* and contribution of CpsF to capsule serospecificity. *Journal of*  
609 *bacteriology* **191**:6203-6210.
- 610 23. **Mechler L, Herbig A, Paprotka K, Fraunholz M, Nieselt K, Bertram R.** 2015. A novel  
611 point mutation promotes growth phase-dependent daptomycin tolerance in  
612 *Staphylococcus aureus*. *Antimicrobial agents and chemotherapy* **59**:5366-5376.
- 613 24. **Boyd DA, Willey BM, Fawcett D, Gillani N, Mulvey MR.** 2008. Molecular  
614 characterization of *Enterococcus faecalis* N06-0364 with low-level vancomycin  
615 resistance harboring a novel D-Ala-D-Ser gene cluster, *vanL*. *Antimicrobial agents and*  
616 *chemotherapy* **52**:2667-2672.
- 617 25. **Nomura T, Tanimoto K, Shibayama K, Arakawa Y, Fujimoto S, Ike Y, Tomita H.**  
618 2012. Identification of VanN-type vancomycin resistance in an *Enterococcus faecium*  
619 isolate from chicken meat in Japan. *Antimicrobial agents and chemotherapy* **56**:6389-  
620 6392.
- 621 26. **Xu X, Lin D, Yan G, Ye X, Wu S, Guo Y, Zhu D, Hu F, Zhang Y, Wang F, Jacoby GA,**  
622 **Wang M.** 2010. *vanM*, a new glycopeptide resistance gene cluster found in  
623 *Enterococcus faecium*. *Antimicrobial agents and chemotherapy* **54**:4643-4647.

- 624 27. **Reynolds PE, Snaith HA, Maguire AJ, Dutka-Malen S, Courvalin P.** 1994. Analysis of  
625 peptidoglycan precursors in vancomycin-resistant *Enterococcus gallinarum* BM4174.  
626 The Biochemical journal **301** (Pt 1):5-8.
- 627 28. **Zarlenga LJ, Gilmore MS, Sahn DF.** 1992. Effects of amino acids on expression of  
628 enterococcal vancomycin resistance. Antimicrobial agents and chemotherapy **36**:902-  
629 905.
- 630 29. **Van der Aart LT, Lemmens N, van Wamel WJ, van Wezel GP.** 2016. Substrate  
631 Inhibition of VanA by d-Alanine Reduces Vancomycin Resistance in a VanX-Dependent  
632 Manner. Antimicrobial agents and chemotherapy **60**:4930-4939.
- 633 30. **Hancock LE, Murray BE, Sillanpaa J.** 2014. Enterococcal Cell Wall Components and  
634 Structures. In Gilmore MS, Clewell DB, Ike Y, Shankar N (ed.), Enterococci: From  
635 Commensals to Leading Causes of Drug Resistant Infection, Boston.
- 636 31. **Hancock LE.** 2002. Enterococcal Cell Wall, p 385-408. The Enterococci: Pathogenesis,  
637 Molecular Biology, and Antibiotic Resistance. ASM Press, Washington, D.C.
- 638 32. **Ghuysen JM.** 1968. Use of bacteriolytic enzymes in determination of wall structure and  
639 their role in cell metabolism. Bacteriological reviews **32**:425-464.
- 640 33. **Schleifer KH, Kandler O.** 1972. Peptidoglycan types of bacterial cell walls and their  
641 taxonomic implications. Bacteriological reviews **36**:407-477.
- 642 34. **Navarre WW, Schneewind O.** 1999. Surface proteins of gram-positive bacteria and  
643 mechanisms of their targeting to the cell wall envelope. Microbiology and molecular  
644 biology reviews: MMBR **63**:174-229.
- 645 35. **Vollmer W, Blanot D, de Pedro MA.** 2008. Peptidoglycan structure and architecture.  
646 FEMS microbiology reviews **32**:149-167.
- 647 36. **Van Heijenoort J.** 1998. Assembly of the monomer unit of bacterial peptidoglycan.  
648 Cellular and molecular life sciences: CMLS **54**:300-304.
- 649 37. **Anderson JS, Matsushashi M, Haskin MA, Strominger JL.** 1965. Lipid-

- 650 Phosphoacetylmuramyl-Pentapeptide and Lipid-Phosphodisaccharide-Pentapeptide:  
651 Presumed Membrane Transport Intermediates in Cell Wall Synthesis. Proceedings of  
652 the National Academy of Sciences of the United States of America **53**:881-889.
- 653 38. **Anderson JS, Strominger JL.** 1965. Isolation and utilization of phospholipid  
654 intermediates in cell wall glycopeptide synthesis. Biochemical and biophysical research  
655 communications **21**:516-521.
- 656 39. **Van Dam V, Sijbrandi R, Kol M, Swiezewska E, de Kruijff B, Breukink E.** 2007.  
657 Transmembrane transport of peptidoglycan precursors across model and bacterial  
658 membranes. Molecular microbiology **64**:1105-1114.
- 659 40. **Van Heijenoort J.** 2001. Formation of the glycan chains in the synthesis of bacterial  
660 peptidoglycan. Glycobiology **11**:25R-36R.
- 661 41. **Scheffers DJ, Pinho MG.** 2005. Bacterial cell wall synthesis: new insights from  
662 localization studies. Microbiology and molecular biology reviews: MMBR **69**:585-607.
- 663 42. **Rice LB, Carias LL, Rudin S, Hutton R, Marshall S, Hassan M, Josseume N,**  
664 **Dubost L, Marie A, Arthur M.** 2009. Role of class A penicillin-binding proteins in the  
665 expression of beta-lactam resistance in *Enterococcus faecium*. Journal of bacteriology  
666 **191**:3649-3656.
- 667 43. **Ghuysen JM.** 1991. Serine beta-lactamases and penicillin-binding proteins. Annual  
668 review of microbiology **45**:37-67.
- 669 44. **Goffin C, Ghuysen JM.** 1998. Multimodular penicillin-binding proteins: an enigmatic  
670 family of orthologs and paralogs. Microbiology and molecular biology reviews: MMBR  
671 **62**:1079-1093.
- 672 45. **Mainardi JL, Fourgeaud M, Hugonnet JE, Dubost L, Brouard JP, Ouazzani J, Rice**  
673 **LB, Gutmann L, Arthur M.** 2005. A novel peptidoglycan cross-linking enzyme for a  
674 beta-lactam-resistant transpeptidation pathway. The Journal of biological chemistry  
675 **280**:38146-38152.

- 676 46. **Mainardi JL, Morel V, Fourgeaud M, Cremniter J, Blanot D, Legrand R, Frehel C,**  
677 **Arthur M, van Heijenoort J, Gutmann L.** 2002. Balance between two transpeptidation  
678 mechanisms determines the expression of beta-lactam resistance in *Enterococcus*  
679 *faecium*. The Journal of biological chemistry **277**:35801-35807.
- 680 47. **Mainardi JL, Legrand R, Arthur M, Schoot B, van Heijenoort J, Gutmann L.** 2000.  
681 Novel mechanism of beta-lactam resistance due to bypass of DD-transpeptidation in  
682 *Enterococcus faecium*. The Journal of biological chemistry **275**:16490-16496.
- 683 48. **Kristich CJ, Djoric D, Little JL.** 2014. Genetic basis for vancomycin-enhanced  
684 cephalosporin susceptibility in vancomycin-resistant enterococci revealed using  
685 counterselection with dominant-negative thymidylate synthase. Antimicrobial agents and  
686 chemotherapy **58**:1556-1564.
- 687 49. **Nicas TI, Wu CY, Hobbs JN, Jr., Preston DA, Allen NE.** 1989. Characterization of  
688 vancomycin resistance in *Enterococcus faecium* and *Enterococcus faecalis*.  
689 Antimicrobial agents and chemotherapy **33**:1121-1124.
- 690 50. **Williamson R, Al-Obeid S, Shlaes JH, Goldstein FW, Shlaes DM.** 1989. Inducible  
691 resistance to vancomycin in *Enterococcus faecium* D366. The Journal of infectious  
692 diseases **159**:1095-1104.
- 693 51. **Rice P, Longden I, Bleasby A.** 2000. EMBOSS: the European Molecular Biology Open  
694 Software Suite. Trends in genetics: TIG **16**:276-277.
- 695 52. **Chan FY, Torriani A.** 1996. PstB protein of the phosphate-specific transport system of  
696 *Escherichia coli* is an ATPase. Journal of bacteriology **178**:3974-3977.
- 697 53. **Smith JK, Moshref AR, Jennings JA, Courtney HS, Haggard WO.** 2013. Chitosan  
698 sponges for local synergistic infection therapy: a pilot study. Clinical orthopaedics and  
699 related research **471**:3158-3164.
- 700 54. **Cole MR, Hobden JA, Warner IM.** 2015. Recycling antibiotics into GUMBOS: a new  
701 combination strategy to combat multi-drug-resistant bacteria. Molecules **20**:6466-6487.

- 702 55. **Lamarche MG, Kim SH, Crepin S, Mourez M, Bertrand N, Bishop RE, Dubreuil JD,**  
703 **Harel J.** 2008. Modulation of hexa-acyl pyrophosphate lipid A population under  
704 *Escherichia coli* phosphate (Pho) regulon activation. *Journal of bacteriology* **190**:5256-  
705 5264.
- 706 56. **Palmer KL, Godfrey P, Griggs A, Kos VN, Zucker J, Desjardins C, Cerqueira G,**  
707 **Gevers D, Walker S, Wortman J, Feldgarden M, Haas B, Birren B, Gilmore MS.**  
708 2012. Comparative genomics of enterococci: variation in *Enterococcus faecalis*, clade  
709 structure in *E. faecium*, and defining characteristics of *E. gallinarum* and *E. casseliflavus*.  
710 *mBio* **3**:e00318-00311.
- 711 57. **Dahl KH, Simonsen GS, Olsvik O, Sundsfjord A.** 1999. Heterogeneity in the *vanB*  
712 gene cluster of genomically diverse clinical strains of vancomycin-resistant enterococci.  
713 *Antimicrobial agents and chemotherapy* **43**:1105-1110.
- 714 58. **Weigel LM, Clewell DB, Gill SR, Clark NC, McDougal LK, Flannagan SE, Kolonay**  
715 **JF, Shetty J, Killgore GE, Tenover FC.** 2003. Genetic analysis of a high-level  
716 vancomycin-resistant isolate of *Staphylococcus aureus*. *Science* **302**:1569-1571.
- 717 59. **Sahm DF, Kissinger J, Gilmore MS, Murray PR, Mulder R, Solliday J, Clarke B.**  
718 1989. *In vitro* susceptibility studies of vancomycin-resistant *Enterococcus faecalis*.  
719 *Antimicrobial agents and chemotherapy* **33**:1588-1591.
- 720  
721  
722  
723  
724  
725  
726  
727  
728  
729  
730  
731  
732

733 **Figure legends**

734

735 **Figure 1. A  $\Delta ddcP$  mutant has reduced susceptibility to vancomycin/H-CHG synergy.**

736 Optical density ( $OD_{600nm}$ ) of (A) *E. faecium* 1,231,410 wild-type (*E. faecium* 410), (B) the *ddcP*  
737 deletion mutant, and (C) the *ddcP* complemented strain with and without vancomycin and H-  
738 CHG treatment. *E. faecium* was cultured in BHI broth until the  $OD_{600}$  reached 0.6, as described  
739 in materials and methods. Equal volumes of cultures were split into BHI (control; red circles) or  
740 BHI containing vancomycin (50  $\mu$ g/ml) and H-CHG (4.9  $\mu$ g/ml) (blue squares).  $OD_{600}$  values  
741 were monitored for 6 h. Error bars indicate standard deviations from n=3 independent  
742 experiments. Significance was assessed using the one-tailed Student's *t*-test. \* denotes *P*-value  
743 < 0.05. Stars indicate significant differences between vancomycin- and H-CHG-treated cultures  
744 in panel B versus A, and in panel C versus B. Note that growth curve of *E. faecium* 410 wild-  
745 type in the presence of vancomycin and chlorhexidine from Fig. 1A has been shown again in  
746 Fig. S1A for comparison with the *pbp* deletion mutants.

747

748 **Figure 2. A  $\Delta ddcP$  mutant has reduced susceptibility to vancomycin/glycine synergy. (A)**

749 *E. faecium* 410 wild-type and (B) *ddcP* deletion mutant cultures were grown at 37°C in BHI until  
750  $OD_{600}$  reached 0.6 as described in materials and methods. Equal volumes of cultures were split  
751 into BHI (control; red circles) or BHI containing vancomycin (50  $\mu$ g/ml) and glycine (0.2 M)  
752 (green squares).  $OD_{600}$  values were monitored for 6 h and a reading at 24 h was recorded. Error  
753 bars indicate standard deviations from n=3 independent experiments. Significance was  
754 assessed using the one-tailed Student's *t*-test. \* denotes *P*-value < 0.05. Stars indicate  
755 significant differences between vancomycin- and glycine-treated cultures in panel B versus A.

756

757 **Figure 3. *E. faecium* 410 can adapt to vancomycin/H-CHG synergy.** The growth kinetics of

758 *E. faecium* 410 in the presence of vancomycin and H-CHG were observed over a two-day (40 h)

759 growth curve. Panel (A) Representative OD<sub>600</sub> of *E. faecium* 410 after treatment with 0X  
760 (control; red circles), vancomycin (orange squares), H-CHG (green triangles) or vancomycin  
761 and H-CHG (inverted blue triangles). *E. faecium* culture was grown at 37°C in BHI until OD<sub>600</sub>  
762 reached 0.6 and equal volumes of cultures were split into BHI with different antimicrobials  
763 (shown by arrow) as described in materials and methods. OD<sub>600</sub> values were monitored for 6 h  
764 and after 24 h, the vancomycin and H-CHG-treated recovered culture (circled and indicated with  
765 dashed arrow) was used as an inoculum to repeat the growth curve (shown in panel B).

766

767 **Figure 4. Mutations in the phosphate-specific transport (*pst*) operon result in escape**  
768 **from vancomycin-H-CHG synergy.** Growth of (A) *E. faecium* 410 wild-type, (B) SE101, (C) *E.*  
769 *faecium* 410Δ*pst*, and (D) SE101Δ*pst*. *E. faecium* was cultured in BHI until the OD<sub>600</sub> reached  
770 0.6. Equal volumes of cultures were split into BHI (control; red circles) or BHI containing  
771 vancomycin (50 µg/ml) and H-CHG (4.9 µg/ml) (blue squares). OD<sub>600</sub> values were monitored for  
772 6 h and the 24 h time point was recorded. Error bars indicate standard deviations from n=3  
773 independent experiments. Significance was assessed using the one-tailed Student's *t*-test. \*  
774 denotes *P*-value < 0.05. Stars indicate significant differences between vancomycin- and H-  
775 CHG-treated cultures in panel B versus A, in panel C versus A, and in panel D versus B.

776

#### 777 **Supplemental Figures and Tables**

778

779 **Figure S1. Representative optical density (OD<sub>600</sub>) of (A) *E. faecium* 410 wild-type, (B)**  
780 **Δ*pbpZ*, (C) Δ*vanY*, (D) Δ*ponA*, (E) Δ*ddcP* Δ*vanY*, (F) Δ*ldt<sub>fm</sub>*, (G) Δ*ddcP* Δ*ldt<sub>fm</sub>*, (H) Δ*pbpB*,**  
781 **(I) Δ*pbpF*, (J) Δ*pbp5*, (K) Δ*ddcY*, and (L) Δ*pbpA* after vancomycin and chlorhexidine**  
782 **treatment.** *E. faecium* was cultured at 37°C in BHI broth until the OD<sub>600</sub> reached 0.6 as  
783 described in the materials and methods. Equal volumes of culture were split into BHI containing  
784 0X (control; red circles) or vancomycin and chlorhexidine (Van and H-CHG; blue squares).

785 OD<sub>600</sub> values were monitored for 6 h. Error bars indicate standard deviations from three  
786 independent experiments.

787

788 **Figure S2. Quantification of intracellular organic phosphate (Pi) levels in *E. faecium* 410**  
789 **wild-type and SE101 synergy escaper mutant.** Intracellular Pi levels were measured for both  
790 strains at different growth time points (OD<sub>600</sub> 0.4-1.0) as described in materials and methods.  
791 The levels (pmoles) were normalized using CFU count. Standard deviation was calculated from  
792 n=5 independent experiments and significance value was calculated using one-tailed Student's *t*  
793 test. Time points: 1, OD<sub>600</sub> 0.4-0.5; 2, OD<sub>600</sub> 0.6-0.7; 3, OD<sub>600</sub> 0.7-0.8; 4, OD<sub>600</sub> 0.8-0.9; OD<sub>600</sub>  
794 1.0-1.5.

795

796 **Table S1. List of primers used in the study.**

797



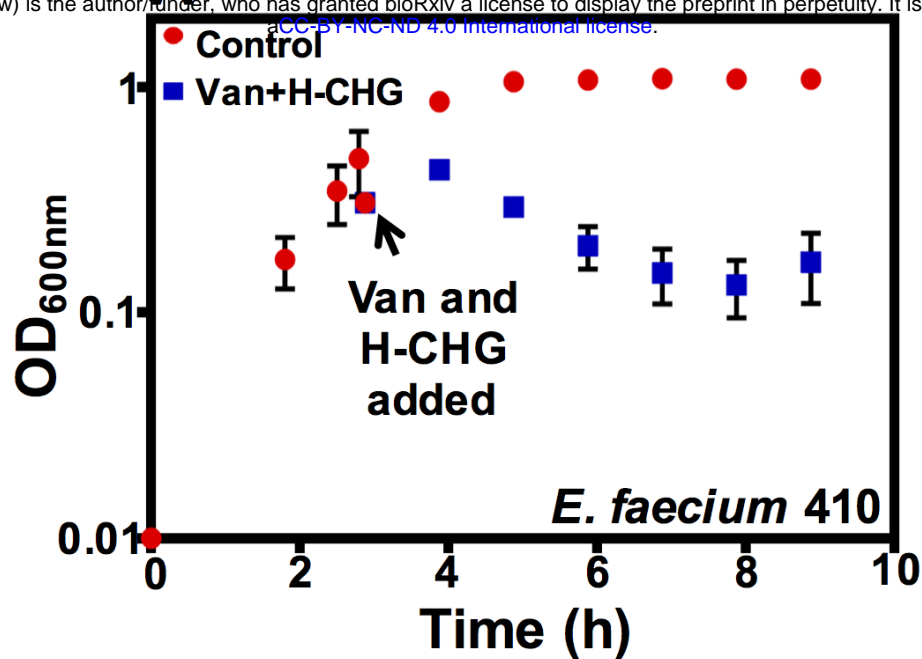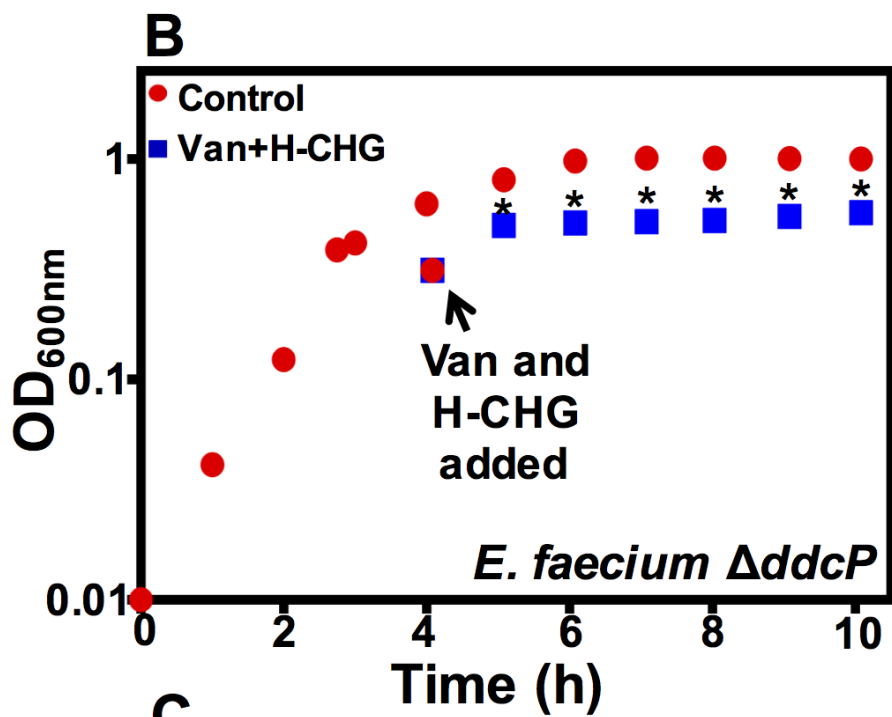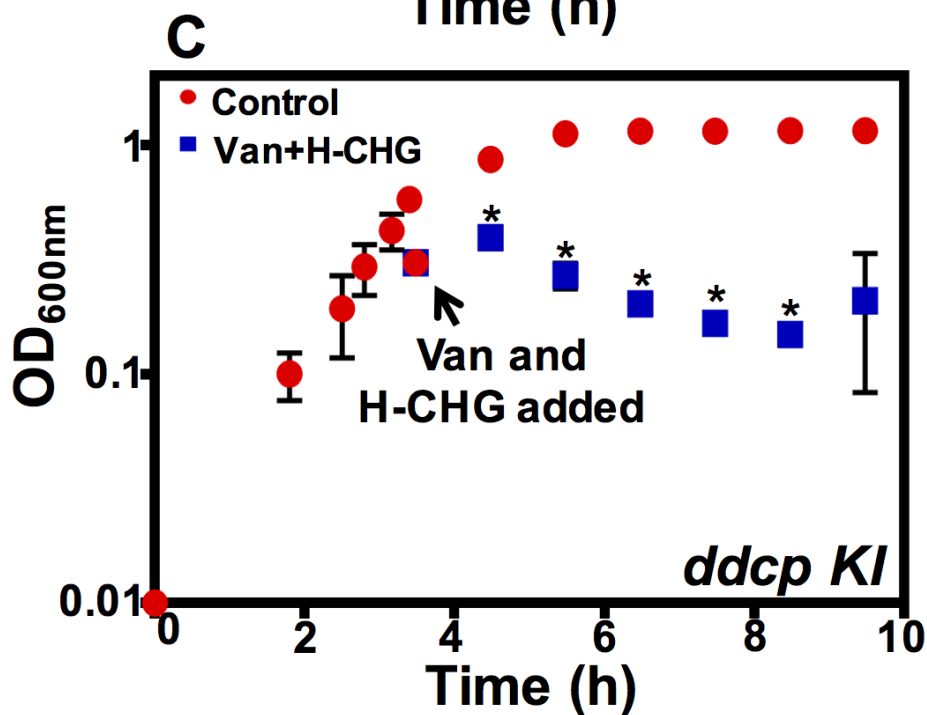

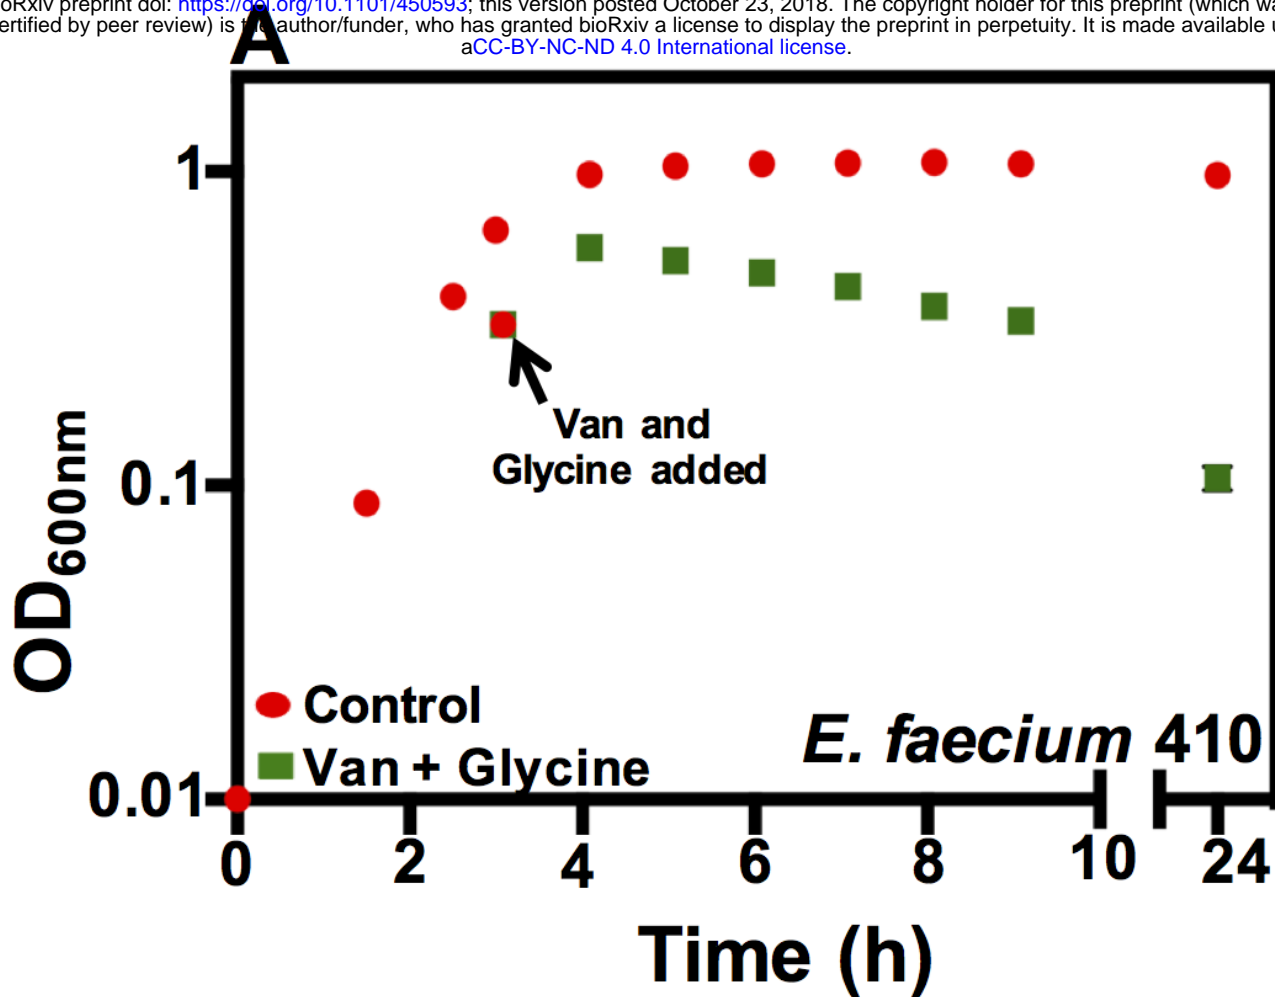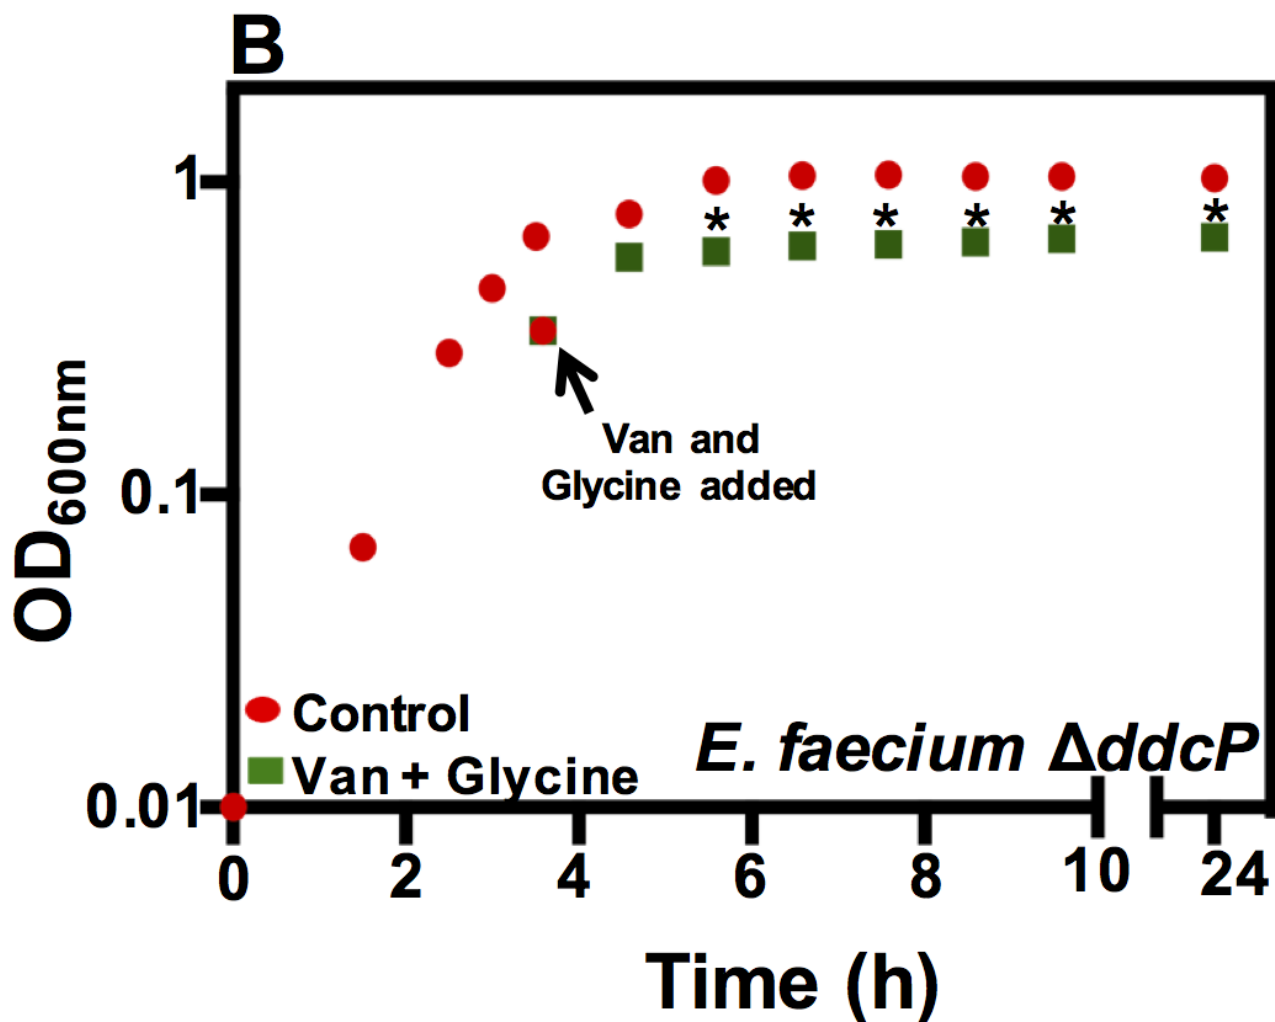

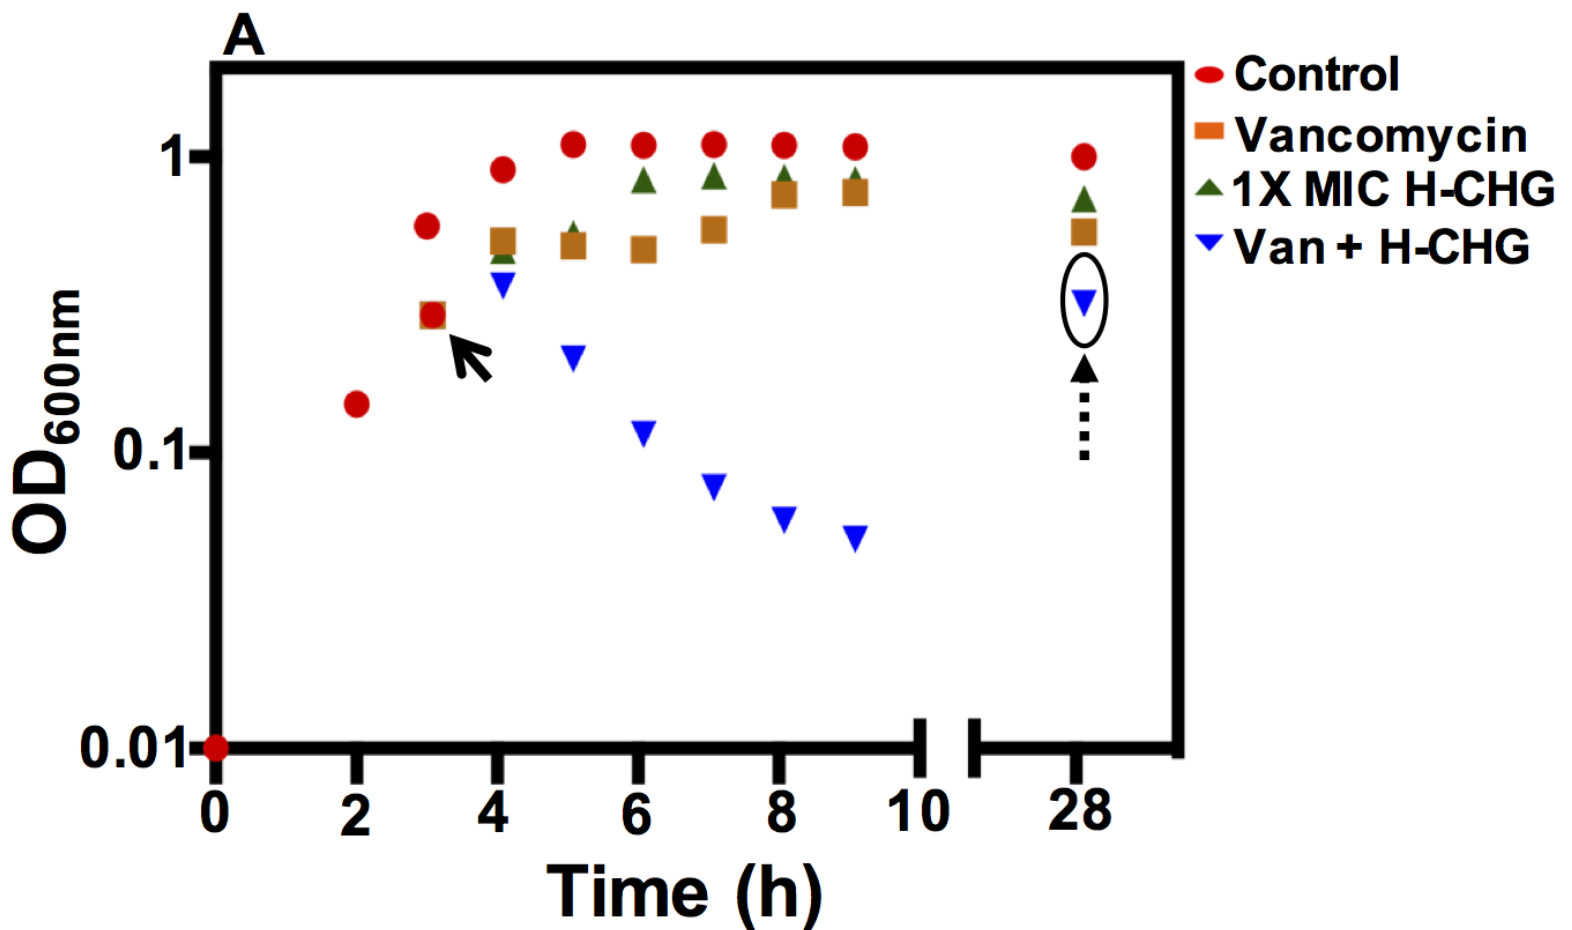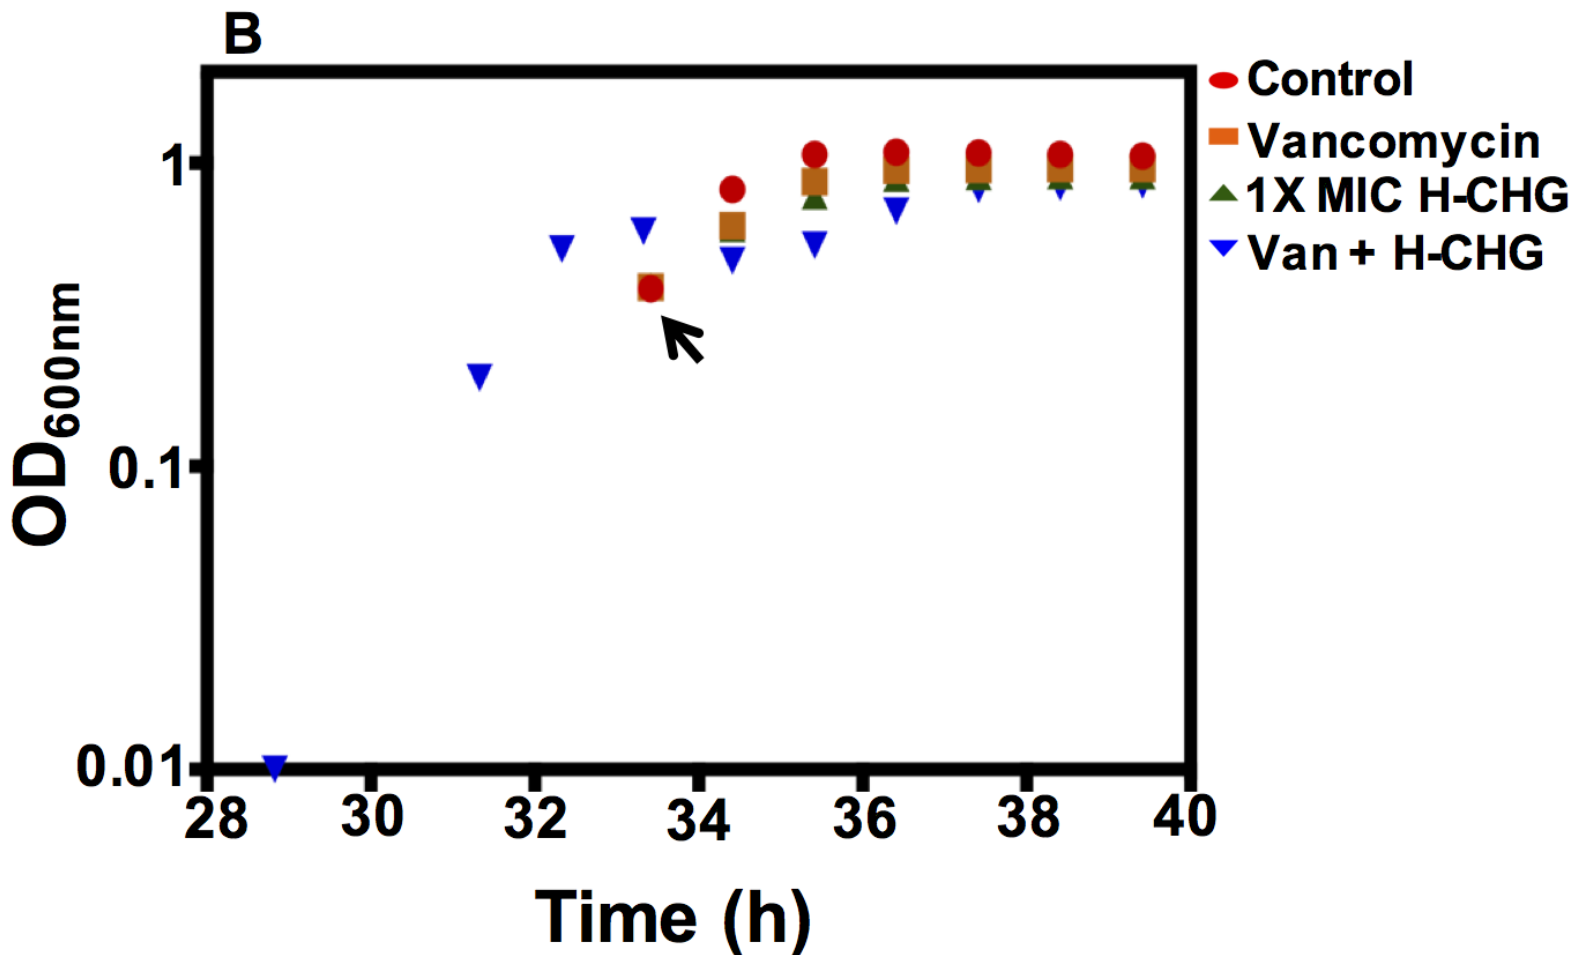

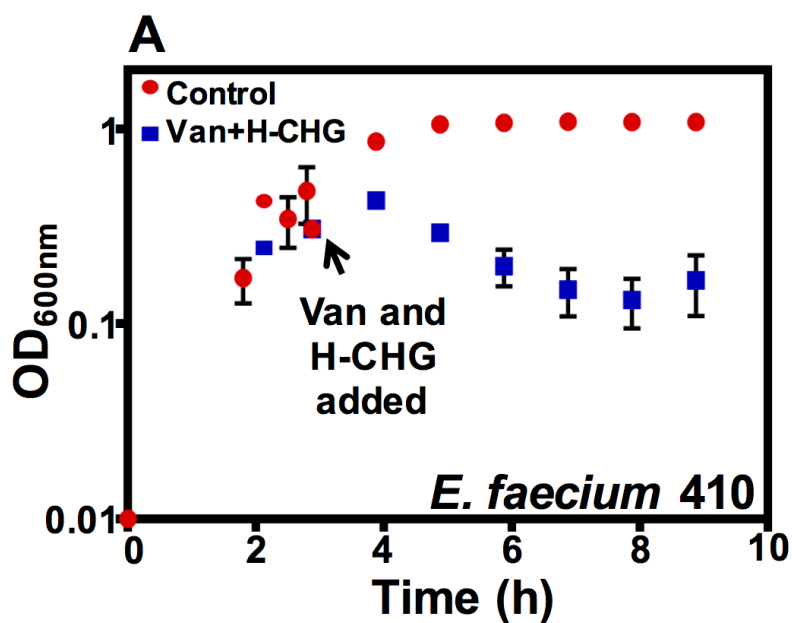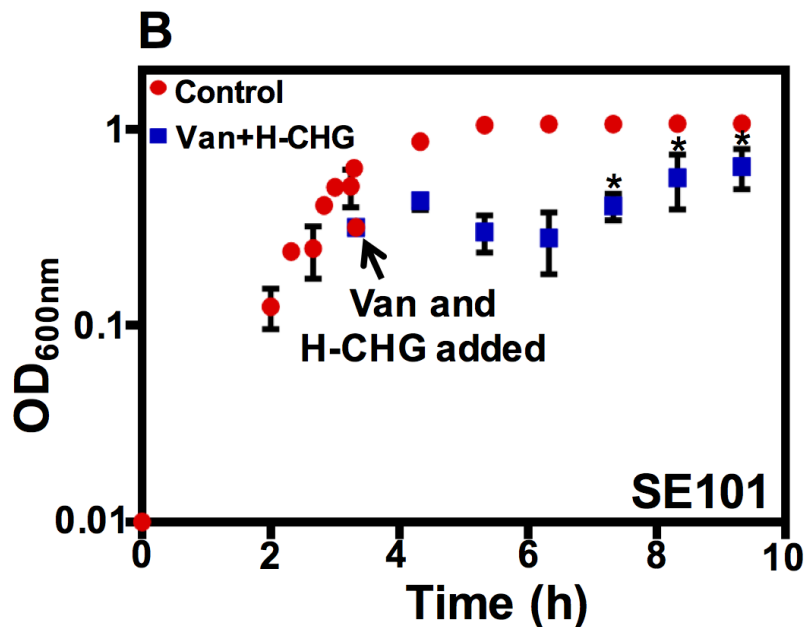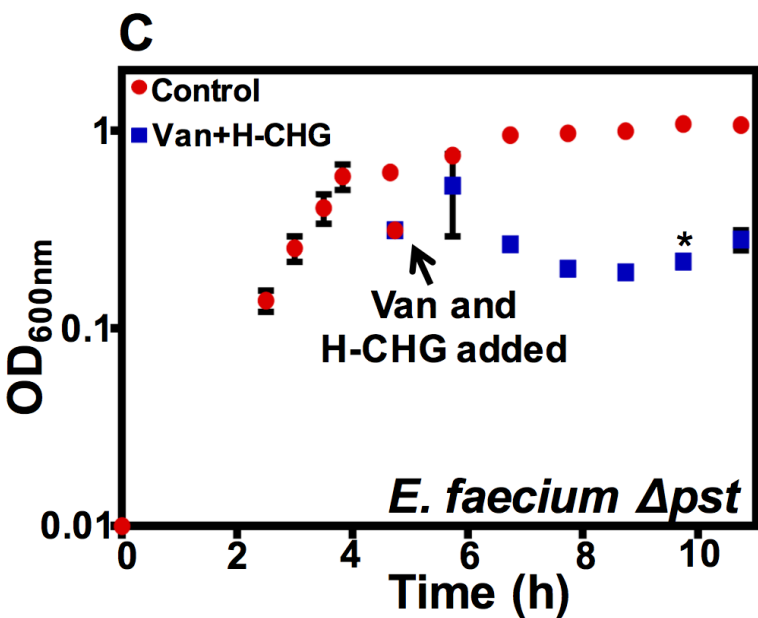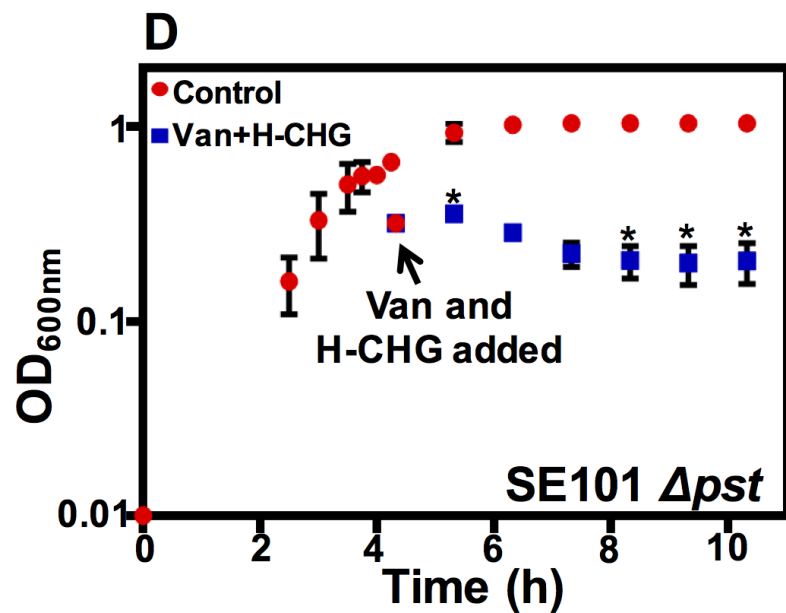

Source: https://biorxiv.org/content/biorxiv/early/2018/10/23/450593.full-text.pdf
